# Supplementary material for: A Systematic Review of Mapping Strategies for the Sonification of Physical Quantities
Source: PLOS journal article supplement (doi:10.1371/journal.pone.0082491), 2013-12-17
Supplement: S2 (10.1371/journal.pone.0082491.s002) [file journal.pone.0082491.s002]

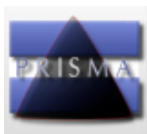

## PRISMA 2009 Flow Diagram

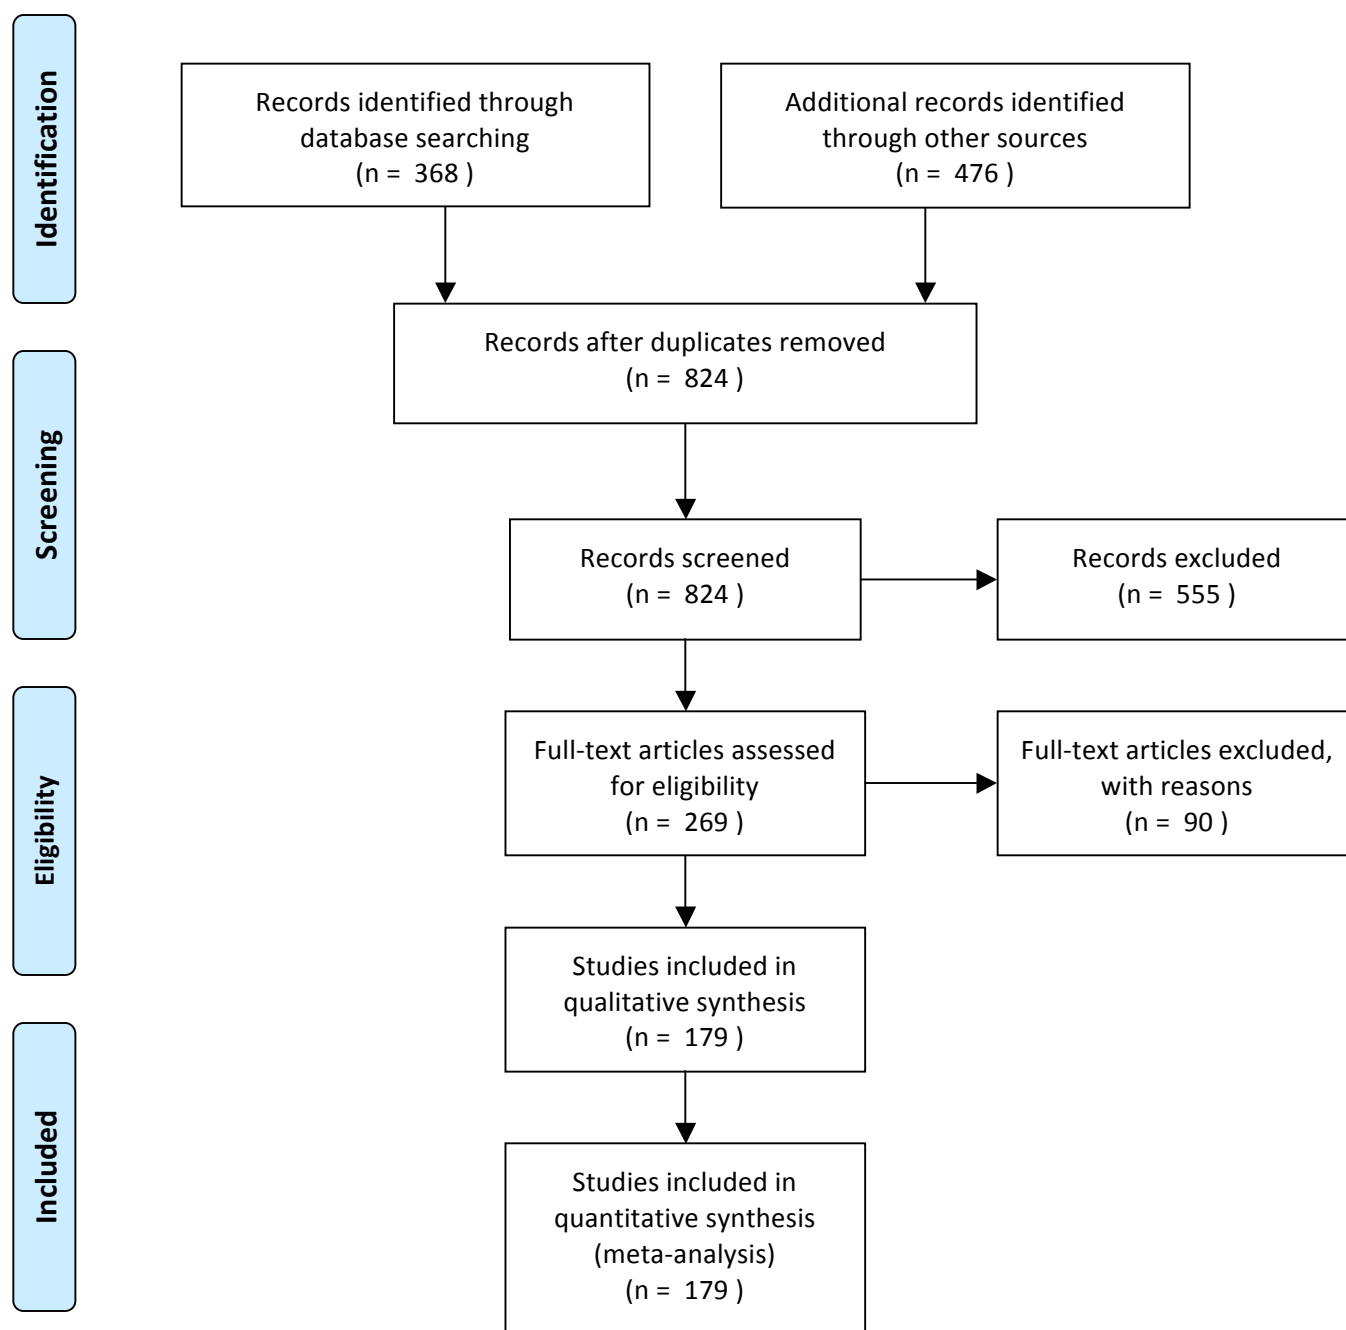

From: Moher D, Liberati A, Tetzlaff J, Altman DG, The PRISMA Group (2009). Preferred Reporting Items for Systematic Reviews and Meta-Analyses: The PRISMA Statement. PLoS Med 6(6): e1000097. doi:10.1371/journal.pmed1000097

For more information, visit [www.prisma-statement.org](http://www.prisma-statement.org).
